# Supplementary material for: Two novel oxovanadium–organophosphonate hybrids with a 3D supramolecular structure: synthesis, crystal structures, surface photovoltage and luminescent properties
Source: Royal Society of Chemistry journal article supplement (doi:10.1039/c4ra07364a), 2014-01-01
Supplement: c4ra07364a1.pdf [file c4ra07364a1.pdf]

# Two novel oxovanadium–organophosphonate hybrids with a 3D supramolecular structure: synthesis, crystal structures, surface photovoltage and luminescent properties

Ming–Xue Ma, Zhen–Gang Sun,\* Yan–Yu Zhu, Guang–Ning Zhang, Tong Sun, Wen–Zhu Li and Hui Luo

## Supporting Information

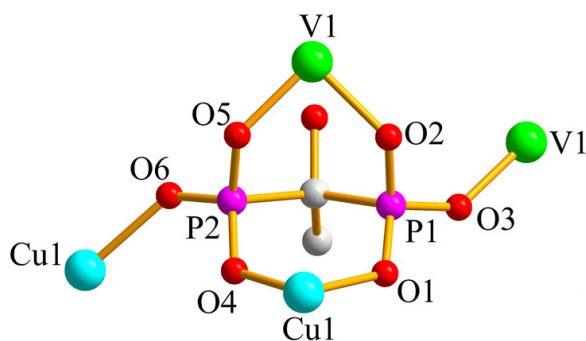

Fig. S1 The coordination mode of hedpH<sub>4</sub> in compound 1.

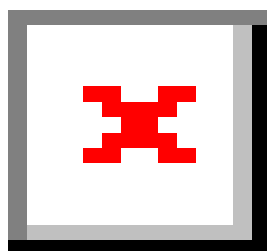

Fig. S2 The IR spectra of compounds 1 and 2.

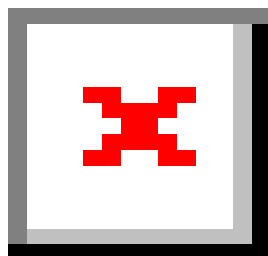

**Fig. S3** The simulated XRD pattern of compound **1** (down) and experimental powder XRD patterns of compounds **1** and **2**.

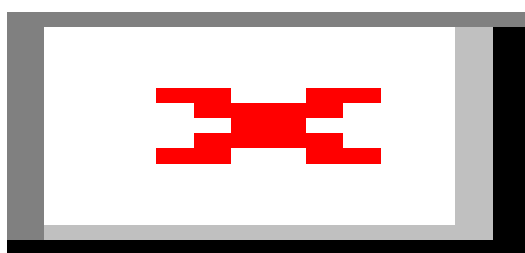

**Fig. S4** The TG–DTG curves of compounds **1** (a), **2** (b).

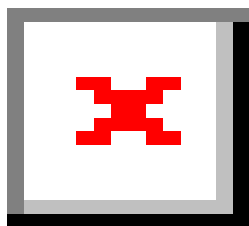

**Fig. S5** Solid-state emission spectrum of hedpH<sub>4</sub> at room temperature.

**Table S1** Selected bond lengths (Å) and angles (deg) for compounds **1** and **2**<sup>a</sup>

| Compound 1       |            |                   |            |
|------------------|------------|-------------------|------------|
| V(1)–O(9)        | 1.597(4)   | Cu(1)–O(6)#1      | 2.152(3)   |
| V(1)–O(5)        | 1.965(3)   | P(1)–O(1)         | 1.507(3)   |
| V(1)–O(3)#2      | 1.970(3)   | P(1)–O(3)         | 1.523(4)   |
| V(1)–O(2)        | 2.015(4)   | P(1)–O(2)         | 1.549(4)   |
| V(1)–O(8)        | 2.059(4)   | P(1)–C(1)         | 1.830(6)   |
| Cu(1)–O(4)       | 1.936(4)   | P(2)–O(6)         | 1.511(4)   |
| Cu(1)–O(1)       | 1.977(3)   | P(2)–O(4)         | 1.519(4)   |
| Cu(1)–N(1)       | 2.028(5)   | P(2)–O(5)         | 1.529(4)   |
| Cu(1)–N(2)       | 2.028(5)   | P(2)–C(1)         | 1.837(5)   |
| O(9)–V(1)–O(5)   | 102.68(18) | O(4)–Cu(1)–O(1)   | 92.45(15)  |
| O(9)–V(1)–O(3)#2 | 102.54(18) | O(4)–Cu(1)–N(1)   | 91.47(18)  |
| O(5)–V(1)–O(3)#2 | 154.31(16) | O(1)–Cu(1)–N(1)   | 160.92(17) |
| O(9)–V(1)–O(2)   | 98.07(18)  | O(4)–Cu(1)–N(2)   | 170.41(19) |
| O(5)–V(1)–O(2)   | 90.95(14)  | O(1)–Cu(1)–N(2)   | 92.71(17)  |
| O(3)#2–V(1)–O(2) | 90.32(15)  | N(1)–Cu(1)–N(2)   | 81.1(2)    |
| O(9)–V(1)–O(8)   | 101.69(18) | O(4)–Cu(1)–O(6)#1 | 92.77(14)  |
| O(5)–V(1)–O(8)   | 86.39(15)  | O(1)–Cu(1)–O(6)#1 | 109.05(14) |
| O(3)#2–V(1)–O(8) | 83.80(15)  | N(1)–Cu(1)–O(6)#1 | 89.39(16)  |
| O(2)–V(1)–O(8)   | 160.17(15) | N(2)–Cu(1)–O(6)#1 | 93.18(17)  |
| Compound 2       |            |                   |            |
| V(1)–O(9)        | 1.589(3)   | Zn(1)–O(6)#1      | 1.961(3)   |
| V(1)–O(5)        | 1.981(3)   | P(1)–O(1)         | 1.510(3)   |
| V(1)–O(3)#2      | 1.969(3)   | P(1)–O(3)         | 1.522(3)   |
| V(1)–O(2)        | 2.024(3)   | P(1)–O(2)         | 1.543(3)   |
| V(1)–O(8)        | 2.063(3)   | P(1)–C(1)         | 1.842(4)   |
| Zn(1)–O(4)       | 2.027(3)   | P(2)–O(6)         | 1.522(3)   |
| Zn(1)–O(1)       | 2.020(3)   | P(2)–O(4)         | 1.508(3)   |
| Zn(1)–N(1)       | 2.138(4)   | P(2)–O(5)         | 1.537(3)   |
| Zn(1)–N(2)       | 2.162(4)   | P(2)–C(1)         | 1.842(4)   |
| O(9)–V(1)–O(5)   | 102.47(15) | O(1)–Zn(1)–O(4)   | 92.21(11)  |
| O(9)–V(1)–O(3)#2 | 102.94(15) | O(4)–Zn(1)–N(1)   | 90.06(14)  |
| O(3)#2–V(1)–O(5) | 154.04(13) | O(1)–Zn(1)–N(1)   | 146.60(14) |
| O(9)–V(1)–O(2)   | 98.86(14)  | O(4)–Zn(1)–N(2)   | 160.65(14) |
| O(5)–V(1)–O(2)   | 91.30(12)  | O(1)–Zn(1)–N(2)   | 91.10(13)  |
| O(3)#2–V(1)–O(2) | 89.95(11)  | N(1)–Zn(1)–N(2)   | 76.87(15)  |
| O(9)–V(1)–O(8)   | 100.71(15) | O(6)#1–Zn(1)–O(1) | 115.48(12) |
| O(5)–V(1)–O(8)   | 86.24(12)  | O(6)#1–Zn(1)–O(4) | 96.35(12)  |
| O(3)#2–V(1)–O(8) | 83.95(12)  | O(6)#1–Zn(1)–N(1) | 97.34(14)  |
| O(2)–V(1)–O(8)   | 160.35(12) | O(6)#1–Zn(1)–N(2) | 99.41(14)  |

<sup>a</sup> Symmetry transformations used to generate equivalent atoms: #1  $-x + 1/2, y + 1/2, -z + 1/2$ ; #2  $-x + 1/2, -y + 1/2, -z$ .

**Table S2** The exploration of optimum experimental conditions of compounds **1** and **2**

| Compound <b>1</b> ( $\text{NaVO}_3 \cdot 2\text{H}_2\text{O} / \text{CuCl}_2 \cdot 2\text{H}_2\text{O} / 1,10\text{-phen/hedpH}_4$ )                                                                                                                                                |         |         |         |         |         |         |         |
|-------------------------------------------------------------------------------------------------------------------------------------------------------------------------------------------------------------------------------------------------------------------------------------|---------|---------|---------|---------|---------|---------|---------|
| Molar ratio \ Temperature ( °C )                                                                                                                                                                                                                                                    | 1:1:1:1 | 3:2:3:3 | 3:1:3:3 | 3:4:3:3 | 3:5:3:3 | 3:5:3:4 | 3:5:3:2 |
| 100                                                                                                                                                                                                                                                                                 | ●       | ●       | ●       | ●       | △       | △       | ▲       |
| 120                                                                                                                                                                                                                                                                                 | ●       | △       | △       | ■△      | ■       | ■△      | ▲       |
| 140                                                                                                                                                                                                                                                                                 | ●       | ■△      | ■△      | ■△      | ■       | ■       | ▲       |
| 160                                                                                                                                                                                                                                                                                 | ●       | ■△      | ■△      | ■△      | ▲       | ■       | ★       |
| 180                                                                                                                                                                                                                                                                                 | ●       | △       | △       | ■△      | ■       | ●       | ▲       |
| Compound <b>2</b> ( $\text{NaVO}_3 \cdot 2\text{H}_2\text{O} / \text{ZnSO}_4 \cdot 7\text{H}_2\text{O} / 1,10\text{-phen/hedpH}_4$ )                                                                                                                                                |         |         |         |         |         |         |         |
| Molar ratio \ Temperature ( °C )                                                                                                                                                                                                                                                    | 3:5:3:2 | 3:5:3:5 | 3:5:3:7 | 3:5:3:9 | 3:5:4:7 | 3:5:5:7 |         |
| 100                                                                                                                                                                                                                                                                                 | ●       | ●       | ●       | ●       | ●       | ▲       |         |
| 120                                                                                                                                                                                                                                                                                 | ●       | ●       | ●       | ▲       | ●       | ◆       |         |
| 140                                                                                                                                                                                                                                                                                 | ▲       | ▲       | ●       | ▲       | ▲       | ◆       |         |
| 160                                                                                                                                                                                                                                                                                 | ▲       | ▲       | ▲       | ▲       | ▲       | ★       |         |
| 180                                                                                                                                                                                                                                                                                 | ●       | ●       | ●       | ●       | ●       | ▲       |         |
| All the experiments were explored at reaction time of 72h                                                                                                                                                                                                                           |         |         |         |         |         |         |         |
| <ul style="list-style-type: none"> <li>● Powders</li> <li>△ Powders and red crystals</li> <li>■ Powders and blue crystals</li> <li>▲ Impure crystals or powders</li> <li>◆ Green crystals but not good enough for X-ray diffraction study</li> <li>★ Best green crystals</li> </ul> |         |         |         |         |         |         |         |
